# Supplementary material for: Inter-ligand azo (NN) unit formation and stabilization of a Co(ii)-diradical complex via metal-to-ligand dπ–pπ* back donation: synthesis, characterization, and theoretical study
Source: Royal Society of Chemistry journal article supplement (doi:10.1039/c4dt03214d), 2015-01-01
Supplement: c4dt03214d1.pdf [file c4dt03214d1.pdf]

## Supporting Information

Inter-Ligand Azo (N=N) Unit Formation and Thereafter Stabilization of A Co(II)–Diradical Complex *via* Metal-to-Ligand  $d\pi-p\pi$  back donation: Synthesis, Characterization, and Theoretical Study\*\*

Richa Rakshit,<sup>a</sup> Samir Ghorai,<sup>a</sup> Amrit Sarmah,<sup>b</sup> Archana Tiwari,<sup>c</sup> Ram Kinkar Roy,<sup>b</sup> and Chandan Mukherjee\*<sup>a</sup>

**\*Corresponding address:**

Dr. Chandan Mukherjee, Department of Chemistry, Indian Institute of Technology, Guwahati, 781039, Assam, India

Email: [cmukherjee@iitg.ernet.in](mailto:cmukherjee@iitg.ernet.in)

Phone No. +91-361-258-2327

Fax: +91-361-258-2349

| <b>Contents</b>                                                                                                     | <b>Page</b> |
|---------------------------------------------------------------------------------------------------------------------|-------------|
| Material Physical Methods and Computational methods                                                                 | S3          |
| Experimental Section: Synthesis and Characterization of H <sub>3</sub> Rich <sup>N<sub>3</sub></sup> , and <b>1</b> | S4          |
| Selected bond distances (Å) and bond angles (°) for <b>1</b>                                                        | S5          |
| Crystallographic data and structure refinement for <b>1</b> (Table 2)                                               | S6          |
| X-ray and computational bond distance (selected) comparison data (Table 3)                                          | S6          |
| Parameters for the optimized geometry                                                                               | S7-S8       |
| A mechanistic proposal is shown for the formation of <b>1</b> , and Reference                                       | S9          |

**Materials:**

All the chemicals and solvents were obtained from commercial sources and were used as supplied, unless noted otherwise. 3,5-di-*tert*-butylcatechol, was purchased from Sigma–Aldrich. Solvents were obtained from Merck (India). phthalic anhydride was purchased from Merck (India).

**Physical Methods:**

X–ray crystallographic data were collected using Super Nova, Single source at offset, Eos diffractometer. Structures were solved by direct methods using SHELXS–97 and refined with full-matrix least squares on  $F^2$  using SHELXL–97. All the non–hydrogen atoms were refined anisotropically.

IR spectra were recorded on Perkin Elmer Instrument at normal temperature making KBr pellet grinding the sample with KBr (IR Grade). UV–vis/NIR spectra were recorded on Perkin Elmer, Lamda 750, UV/VIS/NIR spectrometer preparing a known concentration of the samples in HPLC Grade  $\text{CH}_2\text{Cl}_2$  at room temperature using cuvette of 1 cm width. EPR spectra were measured on X–Band Microwave Unit, JES–FA200 ESR spectrometer at 77 K. Mass spectral data were obtained from either HRMS or QTOF MS Spectrometer. Variable-temperature magnetic susceptibility measurements were performed using SQUID magnetometer at 0.1T.

## Experimental Section:

Synthesis of 2-azidoaniline has already been reported.<sup>1</sup>

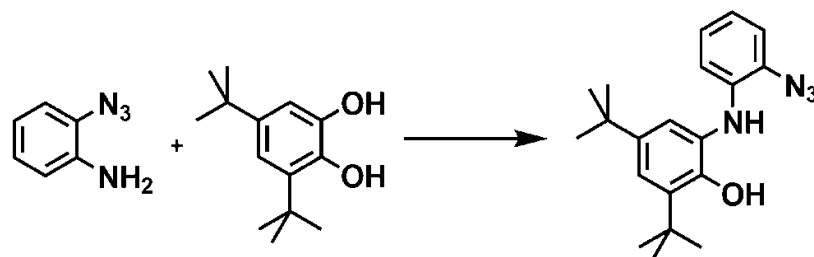

**Synthesis of [C<sub>20</sub>H<sub>26</sub>N<sub>4</sub>O], H<sub>2</sub>Rich(AP)<sup>N<sub>3</sub></sup>:** To a solution of 3,5-di-*tert*-butylcatechol (2.58 g, 11.64 mmol) and 2-azidoaniline (1.56g, 11.64 mmol) in hexane (25 mL), Et<sub>3</sub>N (0.05 mL) was added and the resulting solution was stirred for 48 h at room temperature (30 °C). During this period a brown precipitate appeared which was recrystallized from methanol giving colourless crystalline solid. This solid was washed twice with methanol (5 mL) and then, dried under high vacuum. Yield: 2.37 g, 60%. FTIR (KBr pellet cm<sup>-1</sup>): 3424, 3348, 2955, 2901, 2867, 2131, 2093, 1592, 1501, 1480, 1419, 1359, 1293, 1218, 1197, 1146, 1117, 1090, 1042, 969, 882, 825, 806, 764, 744, 610. <sup>1</sup>H NMR (CDCl<sub>3</sub>, 399.85 MHz): δ 7.23 (d, *J* = 2.4 Hz, 1H), 7.13 (dd, *J* = 8.0, 1.2 Hz, 1H), 6.98–6.94 (m, 2H), 6.87 (td, *J* = 7.6, 1.6 Hz, 1H), 6.42 (dd, *J* = 8.0, 1.2 Hz, 1H), 6.28 (s, 1H), 5.38 (s, 1H), 1.44 (s, 9H), 1.26 (s, 9H) ppm. <sup>13</sup>C NMR (CDCl<sub>3</sub>, 100.55 MHz): δ 149.8, 142.5, 138.6, 135.6, 127.1, 126.2, 125.9, 122.5, 121.8, 120.0, 118.2, 114.7, 35.2, 34.6, 31.8, 29.7 ppm. Anal. Calcd for C<sub>20</sub>H<sub>26</sub>N<sub>4</sub>O: C, 70.96; H, 7.75; N, 16.56. Found: C, 71.49; H, 7.86; N, 16.55. ESI-MS (+) *m/z* for [C<sub>20</sub>H<sub>26</sub>N<sub>4</sub>O+H]<sup>+</sup>: calcd, 339.2179; found, 339.2175.

**Synthesis of [C<sub>40</sub>H<sub>49</sub>ClCoN<sub>4</sub>O<sub>2</sub>], 1:** To a solution of H<sub>2</sub>Rich(AP)<sup>N<sub>3</sub></sup> (0.338 g, 1 mmol) in acetonitrile (10 mL), CoCl<sub>2</sub>•6H<sub>2</sub>O (0.238 g, 1 mmol) was added followed by addition of Et<sub>3</sub>N (0.2 mL). The resulted solution was stirred for 2 h at room temperature under air. A brown-black precipitate appeared which was washed with acetonitrile (5 mL) and then with diethylether (5 mL). Recrystallization of the solid from a dichloromethane/acetonitrile (5:1) solvent mixture afforded a crystalline compound that was suitable for single crystal X-ray diffraction measurement. Yield: 75 mg, 21%. FTIR (KBr pellet cm<sup>-1</sup>): 3243, 2955, 2905, 2867, 1583, 1522, 1479, 1385, 1359, 1310, 1248, 1201, 1099, 1028, 996, 912, 755. Anal. Calcd for C<sub>40</sub>H<sub>49</sub>ClCoN<sub>4</sub>O<sub>2</sub>•1.5H<sub>2</sub>O: C, 65.01; H, 7.10; N, 7.58. Found: C, 64.70; H, 6.71; N, 7.60. ESI-MS (+) *m/z* for [C<sub>40</sub>H<sub>49</sub>CoN<sub>4</sub>O<sub>2</sub>]<sup>+</sup>: calcd, 676.3187; found, 676.3159.

**Table 1.** Selected bond distances (Å) and bond angles (°) for **1**, [C<sub>40</sub>H<sub>49</sub>ClCoN<sub>4</sub>O<sub>2</sub>].

|            |            |            |            |
|------------|------------|------------|------------|
| Co1–N1     | 1.861(2)   | N1–Co1–N4  | 161.09(11) |
| Co1–N2     | 1.849(2)   | N1–Co1–O1  | 83.06(10)  |
| Co1–N4     | 1.862(2)   | N1–Co1–Cl1 | 101.55(8)  |
| Co1–O1     | 1.890(2)   | N1–C1–C2   | 110.1(2)   |
| Co1–Cl1    | 2.3217(10) | N2–Co1–N1  | 84.88(10)  |
| N1–C1      | 1.355(4)   | N2–Co1–N4  | 93.00(11)  |
| N1–C7      | 1.401(4)   | N2–Co1–O1  | 163.62(10) |
| N2–C12     | 1.434(4)   | N2–Co1–Cl1 | 94.09(8)   |
| N2–N3      | 1.282(3)   | N2–N3–C13  | 119.0(3)   |
| N3–C13     | 1.365(4)   | N3–N2–Co1  | 132.5(2)   |
| N4–C18     | 1.361(4)   | N3–C13–C18 | 127.0(3)   |
| N4–C19     | 1.449(4)   | N4–Co1–O1  | 94.82(10)  |
| O1–C2      | 1.302(3)   | N4–Co1–Cl1 | 97.34(8)   |
| O2–C24     | 1.364(4)   | N4–C18–C13 | 121.9(3)   |
| C1–C6      | 1.411(4)   | O1–Co1–Cl1 | 99.15(7)   |
| C2–C1      | 1.434(4)   | O1–C2–C1   | 116.6(3)   |
| C2–C3      | 1.423(4)   | C2–O1–Co1  | 113.77(18) |
| C3–C4      | 1.378(4)   | C1–N1–Co1  | 116.31(19) |
| C5–C4      | 1.421(4)   | C7–N1–Co1  | 114.22(19) |
| C5–C6      | 1.357(4)   | C7–C12–N2  | 113.5(3)   |
| C7–C8      | 1.391(4)   | C12–C7–N1  | 112.2(2)   |
| C8–C9      | 1.374(4)   | C12–N2–Co1 | 112.89(18) |
| C9–C10     | 1.383(5)   | C18–N4–Co1 | 124.0(2)   |
| C11–C10    | 1.379(4)   | N1–Co1–N4  | 161.09(11) |
| C12–C7     | 1.401(4)   | N1–Co1–O1  | 83.06(10)  |
| C12–C11    | 1.372(4)   | N1–Co1–Cl1 | 101.55(8)  |
| C13–C14    | 1.410(4)   | N1–C1–C2   | 110.1(2)   |
| C13–C18    | 1.426(4)   | N2–Co1–N1  | 84.88(10)  |
| C14–C15    | 1.353(4)   | N2–Co1–N4  | 93.00(11)  |
| C15–C16    | 1.390(5)   | N2–Co1–O1  | 163.62(10) |
| C17–C16    | 1.361(5)   | N2–Co1–Cl1 | 94.09(8)   |
| C18–C17    | 1.429(4)   | N2–N3–C13  | 119.0(3)   |
| C19–C20    | 1.379(4)   | N3–N2–Co1  | 132.5(2)   |
| C19–C24    | 1.392(4)   | N3–C13–C18 | 127.0(3)   |
| C20–C21    | 1.378(4)   | N4–Co1–O1  | 94.82(10)  |
| C21–C22    | 1.391(5)   | N4–Co1–Cl1 | 97.34(8)   |
| C22–C23    | 1.388(5)   | N4–C18–C13 | 121.9(3)   |
| C24–C23    | 1.401(4)   | O1–Co1–Cl1 | 99.15(7)   |
| C7–C12–N2  | 113.5(3)   | O1–C2–C1   | 116.6(3)   |
| C12–C7–N1  | 112.2(2)   | C2–O1–Co1  | 113.77(18) |
| C12–N2–Co1 | 112.89(18) | C1–N1–Co1  | 116.31(19) |
| C18–N4–Co1 | 124.0(2)   | C7–N1–Co1  | 114.22(19) |

**Table 2.** Crystallographic data and structure refinement parameters for **1**, [C<sub>40</sub>H<sub>49</sub>ClCoN<sub>4</sub>O<sub>2</sub>].

|                                                     |                                                                                                                                                        |
|-----------------------------------------------------|--------------------------------------------------------------------------------------------------------------------------------------------------------|
| Empirical formula                                   | C <sub>40</sub> H <sub>49</sub> ClCoN <sub>4</sub> O <sub>2</sub>                                                                                      |
| Formula weight                                      | 712.21                                                                                                                                                 |
| CCDC Number                                         | CCDC 990520                                                                                                                                            |
| Crystal habit, colour                               | block/ brown                                                                                                                                           |
| Crystal size, mm <sup>3</sup>                       | 0.34 X 0.28 X 0.22                                                                                                                                     |
| Temperature, <i>T</i>                               | 293(2) K                                                                                                                                               |
| Wavelength, $\lambda$ (Å)                           | 0.71073                                                                                                                                                |
| Crystal system                                      | triclinic                                                                                                                                              |
| Space group                                         | ' <i>P</i> -1'                                                                                                                                         |
| Unit cell dimensions                                | $a = 9.3974(4)$ Å<br>$b = 11.8652(4)$ Å<br>$c = 17.5161(10)$ Å<br>$\alpha = 101.422(4)^\circ$ , $\gamma = 89.970(3)^\circ$ , $\beta = 92.112(4)^\circ$ |
| Volume, $V$ (Å <sup>3</sup> )                       | 1913.06(15)                                                                                                                                            |
| <i>Z</i>                                            | 2                                                                                                                                                      |
| Calculated density, Mg·m <sup>-3</sup>              | 1.236                                                                                                                                                  |
| Absorption coefficient, $\mu$ (mm <sup>-1</sup> )   | 0.556                                                                                                                                                  |
| <i>F</i> (000)                                      | 754                                                                                                                                                    |
| $\theta$ range for data collection                  | 2.92° to 25.00°                                                                                                                                        |
| Limiting indices                                    | -11 ≤ <i>h</i> ≤ 11, -14 ≤ <i>k</i> ≤ 14, -20 ≤ <i>l</i> ≤ 11                                                                                          |
| Reflection collected / unique                       | 12293/ 6716 [ <i>R</i> (int) = 0.0306]                                                                                                                 |
| Completeness to $\theta$                            | 99.8% ( $\theta = 25.00^\circ$ )                                                                                                                       |
| Max. and min. transmission                          | 0.885/ 0.830                                                                                                                                           |
| Refinement method                                   | 'SHELXL-97 (Sheldrick, 1997)'                                                                                                                          |
| Data / restraints / parameters                      | 6716 / 0 / 446                                                                                                                                         |
| Goodness-of-fit on $F^2$                            | 1.023                                                                                                                                                  |
| Final <i>R</i> indices [ <i>I</i> > 2σ( <i>I</i> )] | <i>R</i> 1 = 0.0499, <i>wR</i> 2 = 0.1054                                                                                                              |
| <i>R</i> indices (all data)                         | <i>R</i> 1 = 0.0753, <i>wR</i> 2 = 0.1198                                                                                                              |
| Largest diff. peak and hole                         | 0.462 and -0.268 e·Å <sup>-3</sup>                                                                                                                     |

**Table 3.** Comparison of optimized bond distances (Å) (some selected ones) with those found by X-ray crystallographic measurement for **1**.

| Bond Distance | X-ray crystal structure | Calculated |
|---------------|-------------------------|------------|
| N2–N3         | 1.282(3)                | 1.28       |
| N2–C12        | 1.434(4)                | 1.40       |
| N4–C18        | 1.361(4)                | 1.34       |
| N1–C1         | 1.355(4)                | 1.33       |
| N1–C7         | 1.401(4)                | 1.38       |
| N3–C13        | 1.365(4)                | 1.34       |
| O1–C2         | 1.302(3)                | 1.27       |

**Table 4.** Parameters for the optimized geometry of **1**.

| Center<br>Number | Atomic<br>Number | Atomic<br>Type | Coordinates (Angstroms) |           |           |
|------------------|------------------|----------------|-------------------------|-----------|-----------|
|                  |                  |                | X                       | Y         | Z         |
| 1                | 27               | 0              | 0.449281                | 1.332322  | -0.109784 |
| 2                | 17               | 0              | 0.380507                | 1.545486  | -2.421072 |
| 3                | 8                | 0              | 0.545159                | -0.609844 | -0.199039 |
| 4                | 7                | 0              | 0.738238                | 3.144721  | 0.245527  |
| 5                | 7                | 0              | -1.406761               | 1.471321  | 0.236817  |
| 6                | 7                | 0              | 2.317434                | 1.172194  | 0.036228  |
| 7                | 8                | 0              | -2.541828               | 0.374875  | -2.102250 |
| 8                | 7                | 0              | -0.076354               | 4.116862  | 0.418236  |
| 9                | 6                | 0              | -1.403336               | 3.912032  | 0.427197  |
| 10               | 6                | 0              | 2.097537                | 3.487052  | 0.188940  |
| 11               | 6                | 0              | 2.978414                | 2.385781  | 0.041434  |
| 12               | 6                | 0              | 1.737931                | -1.050974 | -0.169756 |
| 13               | 6                | 0              | -2.080288               | 2.628523  | 0.347626  |
| 14               | 6                | 0              | -2.185436               | 0.270820  | 0.269816  |
| 15               | 6                | 0              | -2.417663               | -0.348419 | 1.494519  |
| 16               | 1                | 0              | -1.944641               | 0.084665  | 2.372222  |
| 17               | 6                | 0              | 2.803229                | -0.073921 | 0.064492  |
| 18               | 6                | 0              | 4.349964                | 2.636112  | -0.155280 |
| 19               | 1                | 0              | 5.029624                | 1.826197  | -0.383474 |
| 20               | 6                | 0              | 2.587106                | 4.795503  | 0.227858  |
| 21               | 1                | 0              | 1.887259                | 5.613642  | 0.349847  |
| 22               | 6                | 0              | 4.434437                | -1.845357 | 0.251030  |
| 23               | 6                | 0              | -3.510502               | 2.673024  | 0.439747  |
| 24               | 1                | 0              | -4.055317               | 1.738319  | 0.391865  |
| 25               | 6                | 0              | -3.265273               | -1.452907 | 1.598574  |
| 26               | 6                | 0              | -2.160433               | 5.112855  | 0.579012  |
| 27               | 1                | 0              | -1.590982               | 6.035512  | 0.636380  |
| 28               | 6                | 0              | 1.037642                | -3.466096 | -0.793136 |
| 29               | 6                | 0              | 5.826995                | -2.398815 | 0.558991  |
| 30               | 6                | 0              | 2.088600                | -2.442659 | -0.363050 |
| 31               | 6                | 0              | 3.401960                | -2.769745 | -0.139346 |
| 32               | 1                | 0              | 3.692665                | -3.808571 | -0.246436 |
| 33               | 6                | 0              | -2.766586               | -0.226985 | -0.912649 |
| 34               | 6                | 0              | 4.130188                | -0.509923 | 0.329209  |
| 35               | 1                | 0              | 4.873499                | 0.205896  | 0.648816  |
| 36               | 6                | 0              | -3.524552               | 5.101062  | 0.643501  |
| 37               | 1                | 0              | -4.087395               | 6.023202  | 0.749871  |
| 38               | 6                | 0              | 4.824705                | 3.938108  | -0.125939 |
| 39               | 1                | 0              | 5.882835                | 4.124226  | -0.286163 |
| 40               | 6                | 0              | 3.949517                | 5.013225  | 0.086310  |
| 41               | 1                | 0              | 4.336413                | 6.028176  | 0.112110  |
| 42               | 6                | 0              | -3.867650               | -1.901915 | 0.416685  |
| 43               | 1                | 0              | -4.542133               | -2.746155 | 0.474517  |
| 44               | 6                | 0              | 1.642446                | -4.867100 | -0.960585 |
| 45               | 1                | 0              | 2.434215                | -4.887974 | -1.719374 |
| 46               | 1                | 0              | 0.857772                | -5.557495 | -1.288941 |
| 47               | 1                | 0              | 2.049138                | -5.259023 | -0.019996 |
| 48               | 6                | 0              | -3.374755               | -2.302028 | -3.160433 |
| 49               | 1                | 0              | -3.908690               | -2.648758 | -4.054717 |
| 50               | 1                | 0              | -2.773955               | -3.137503 | -2.782727 |
| 51               | 1                | 0              | -2.700747               | -1.494502 | -3.451659 |
| 52               | 6                | 0              | -3.653730               | -1.324777 | -0.841682 |
| 53               | 6                | 0              | -4.194582               | 3.852920  | 0.572571  |

|    |   |   |           |           |           |
|----|---|---|-----------|-----------|-----------|
| 54 | 1 | 0 | -5.280456 | 3.825710  | 0.624796  |
| 55 | 6 | 0 | -4.386681 | -1.837289 | -2.094123 |
| 56 | 6 | 0 | 6.815604  | -1.298057 | 0.963903  |
| 57 | 1 | 0 | 6.489802  | -0.768395 | 1.866791  |
| 58 | 1 | 0 | 6.960141  | -0.563853 | 0.162411  |
| 59 | 1 | 0 | 7.793116  | -1.743440 | 1.179531  |
| 60 | 6 | 0 | -5.271027 | -0.711826 | -2.671542 |
| 61 | 1 | 0 | -6.024791 | -0.397406 | -1.939047 |
| 62 | 1 | 0 | -5.799285 | -1.072005 | -3.563718 |
| 63 | 1 | 0 | -4.677460 | 0.160132  | -2.954284 |
| 64 | 6 | 0 | -3.542647 | -2.080210 | 2.972212  |
| 65 | 6 | 0 | 0.451829  | -3.034307 | -2.153391 |
| 66 | 1 | 0 | -0.026310 | -2.054333 | -2.096833 |
| 67 | 1 | 0 | -0.299514 | -3.763488 | -2.478679 |
| 68 | 1 | 0 | 1.235002  | -2.993064 | -2.919690 |
| 69 | 6 | 0 | 6.383198  | -3.107370 | -0.693719 |
| 70 | 1 | 0 | 7.381289  | -3.510350 | -0.483474 |
| 71 | 1 | 0 | 6.467880  | -2.409287 | -1.534229 |
| 72 | 1 | 0 | 5.752102  | -3.942951 | -1.014343 |
| 73 | 6 | 0 | -0.084146 | -3.554069 | 0.260520  |
| 74 | 1 | 0 | 0.319671  | -3.866498 | 1.231653  |
| 75 | 1 | 0 | -0.823751 | -4.300835 | -0.052698 |
| 76 | 1 | 0 | -0.597351 | -2.599115 | 0.385888  |
| 77 | 6 | 0 | -5.304740 | -3.028899 | -1.781741 |
| 78 | 1 | 0 | -6.090838 | -2.770409 | -1.062171 |
| 79 | 1 | 0 | -4.747698 | -3.889167 | -1.391171 |
| 80 | 1 | 0 | -5.799346 | -3.350905 | -2.705588 |
| 81 | 6 | 0 | 5.728030  | -3.408188 | 1.721511  |
| 82 | 1 | 0 | 6.718072  | -3.824944 | 1.942531  |
| 83 | 1 | 0 | 5.061366  | -4.245046 | 1.487658  |
| 84 | 1 | 0 | 5.352376  | -2.923823 | 2.630033  |
| 85 | 6 | 0 | -2.218838 | -2.515641 | 3.628933  |
| 86 | 1 | 0 | -1.711741 | -3.273776 | 3.021879  |
| 87 | 1 | 0 | -2.407231 | -2.943122 | 4.622128  |
| 88 | 1 | 0 | -1.530103 | -1.673200 | 3.754537  |
| 89 | 6 | 0 | -4.234475 | -1.038379 | 3.874207  |
| 90 | 1 | 0 | -3.612874 | -0.146597 | 4.010783  |
| 91 | 1 | 0 | -4.437030 | -1.461195 | 4.866700  |
| 92 | 1 | 0 | -5.188301 | -0.717054 | 3.439796  |
| 93 | 6 | 0 | -4.454519 | -3.311610 | 2.879422  |
| 94 | 1 | 0 | -5.441390 | -3.060608 | 2.473534  |
| 95 | 1 | 0 | -4.608439 | -3.732076 | 3.880348  |
| 96 | 1 | 0 | -4.015599 | -4.097276 | 2.253250  |
| 97 | 1 | 0 | -1.689469 | 0.869340  | -2.096502 |

---



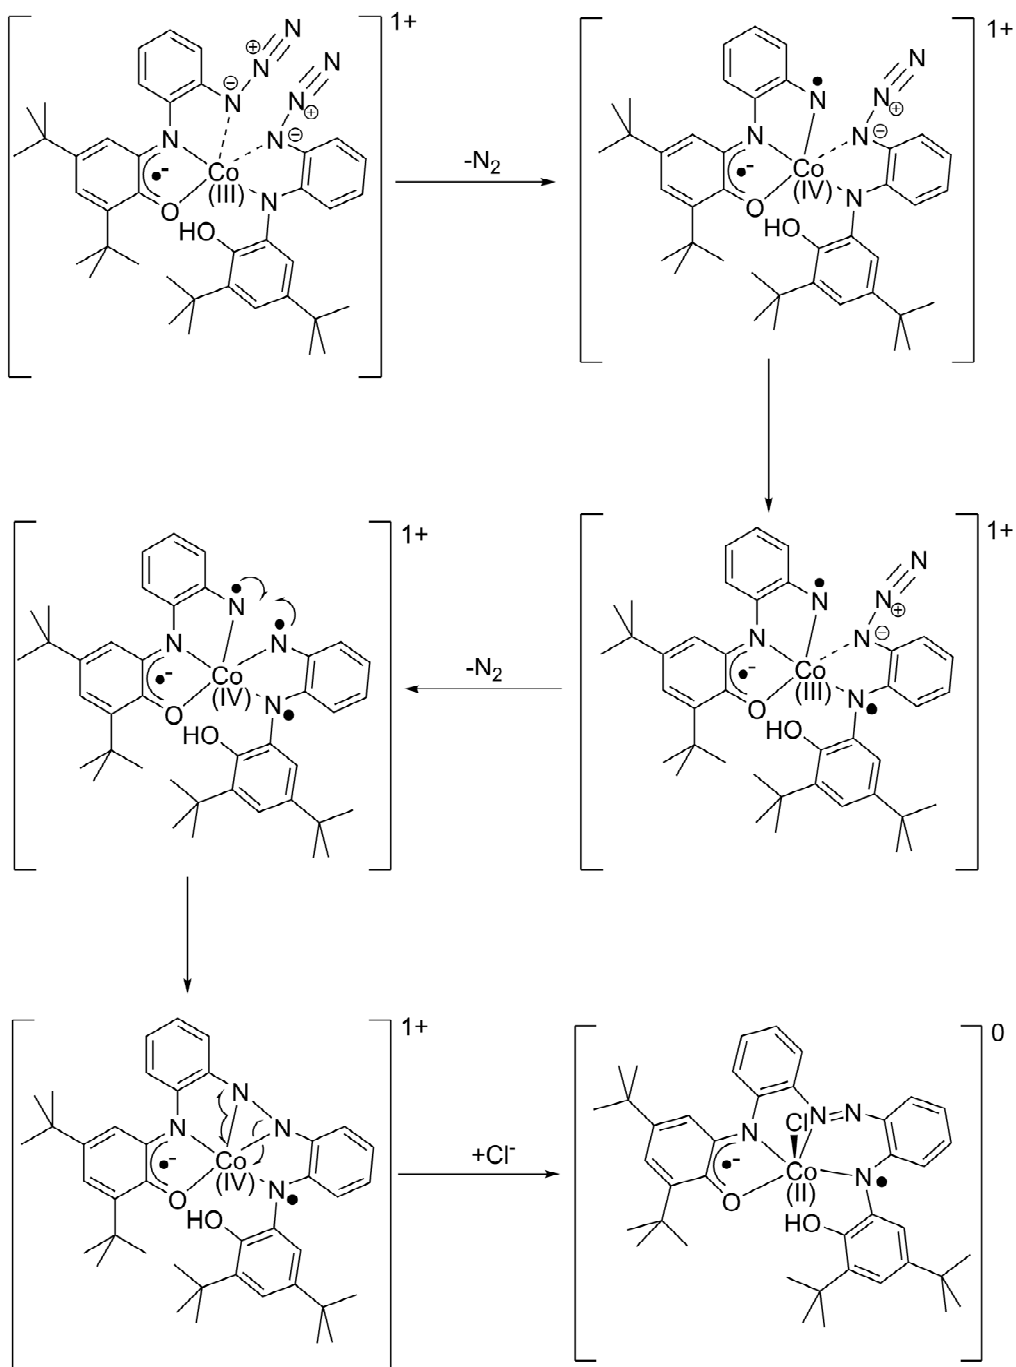

**Scheme 1.** A mechanistic proposal is shown for the formation of **1**.

**Reference:**

- 1) M. Shen, T. G. Driver, *Org. Lett.*, 2008, **15**, 3367.
